# Supplementary material
Source: publisher figshare collection journal article supplement (https://acs.figshare.com/ndownloader/files/15468314)
Supplement: Supplementary file 1 [file 15468314]

## Supporting Information

# Three-dimensional Co-S-P Nanoflowers as Highly Stable Electrode Materials for Asymmetric Supercapacitors

Xiaoya Zhou,<sup>a</sup> Jiawei Zhu,<sup>a</sup> Yao Lu,<sup>a</sup> Yizhou Zhang,<sup>a</sup> Ying Hong,<sup>a</sup> Wenjun Wang,<sup>b</sup> Khasan Karimov,<sup>c</sup> Imran Murtaza,<sup>c</sup> Qian Wang,<sup>a\*</sup> Xiaochen Dong<sup>a,d\*</sup>

<sup>a</sup>Key Laboratory of Flexible Electronics (KLOFE) & Institute of Advanced Materials (IAM), School of Physical and Mathematical Sciences, Nanjing Tech University (NanjingTech), 30 South Puzhu Road, Nanjing 211800, China.

<sup>b</sup>School of Physical Science and Information Technology, Liaocheng University, Liaocheng 252059, China.

<sup>c</sup>Department of Physics, International Islamic University, Sector H-10, Islamabad 44000, Pakistan

<sup>d</sup>School of Chemistry and Materials Science, Nanjing University of Information Science & Technology, Nanjing, 210044, China

### Corresponding Author:

E-mail: chelseawq@njtech.edu.cn

E-mail: iamxcdong@njtech.edu.cn

## Contents:

|                                                                                                               |    |
|---------------------------------------------------------------------------------------------------------------|----|
| <b>Figure S1</b> The XRD pattern of $\text{Co}(\text{OH})_2$ .                                                | S3 |
| <b>Figure S2</b> The SEM image of $\text{Co}_9\text{S}_8/\text{CoO}$ .                                        | S3 |
| <b>Figure S3</b> TEM EDS elemental mapping of Co-S-P                                                          | S4 |
| <b>Figure S4</b> (a) Nitrogen adsorption and desorption curve of Co-S-P, and (b) pore size distribution       | S4 |
| <b>Figure S5</b> (a) CV curves and (b) GCD curves (c) Specific capacities of the electrodes (d) Nyquist plots | S5 |
| <b>Figure S6</b> The electrochemical performances of AC electrode                                             | S6 |
| <b>Figure S7</b> The electrochemical performance of the asymmetric device                                     | S7 |

Total number of pages: 7 (S1-S7)

Total number of figures: 7 (Figure S1-S7)

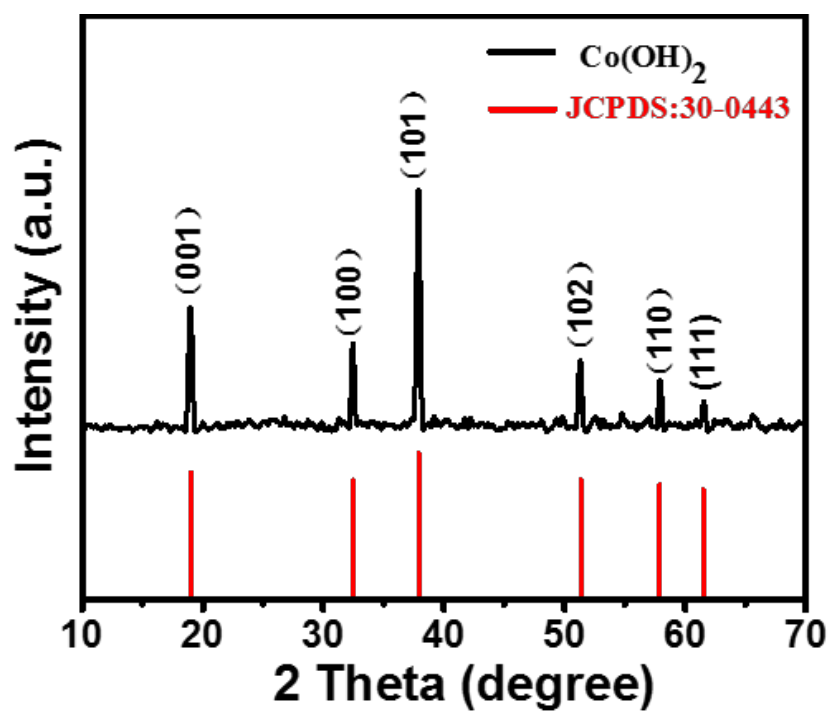

**Figure S1.** The XRD pattern of  $\text{Co(OH)}_2$ .

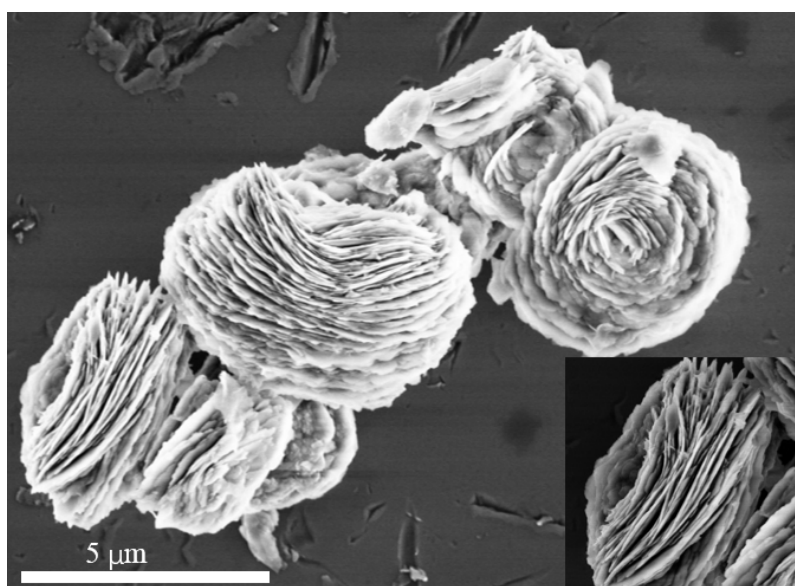

**Figure S2.** The SEM image of  $\text{Co}_9\text{S}_8/\text{CoO}$ .

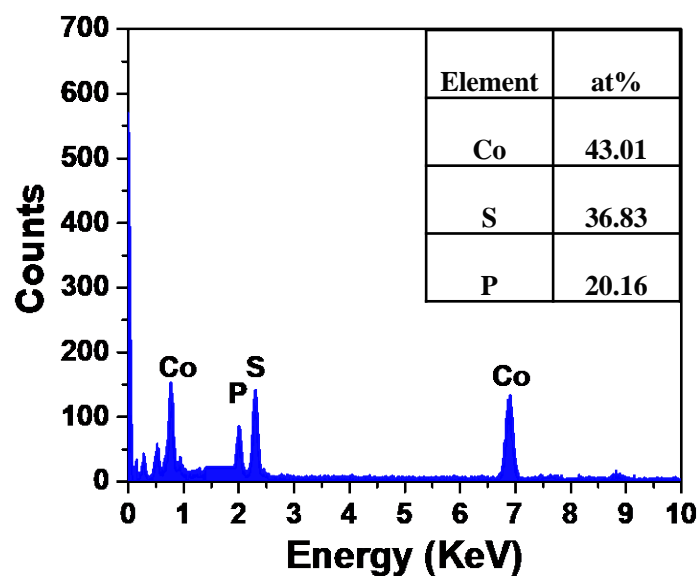

**Figure S3.** TEM EDS elemental mapping of Co-S-P.

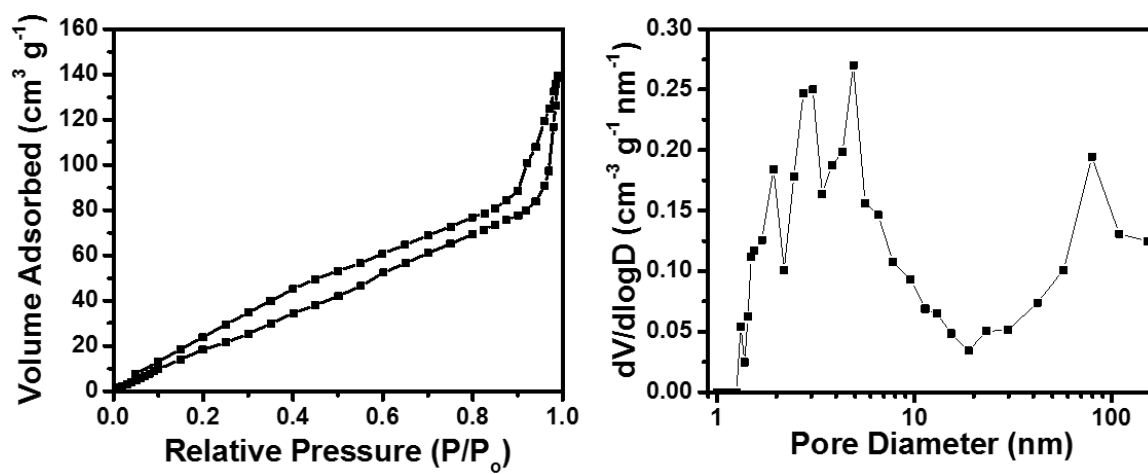

**Figure S4.** (a) Nitrogen adsorption and desorption curve of Co-S-P, and (b) pore size distribution.

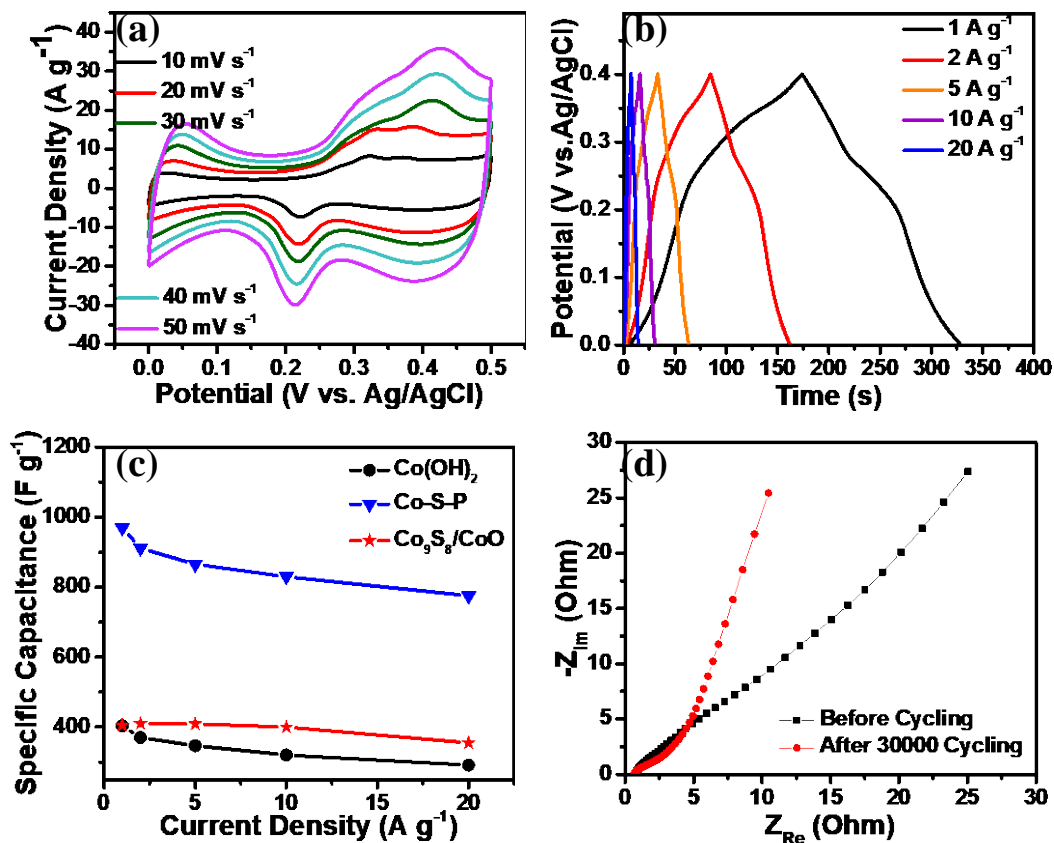

**Figure S5.** (a) CV curves of  $\text{Co}_9\text{S}_8/\text{CoO}$  at different scanning rates. (b) GCD curves of  $\text{Co}_9\text{S}_8/\text{CoO}$  at different current densities. (c) Specific capacities of the  $\text{Co-S-P}$ ,  $\text{Co}_9\text{S}_8/\text{CoO}$ , and  $\text{Co}(\text{OH})_2$  electrodes as a function of current densities. (d) Nyquist plots of  $\text{Co-S-P}$  electrode before and after 30,000 cycles.

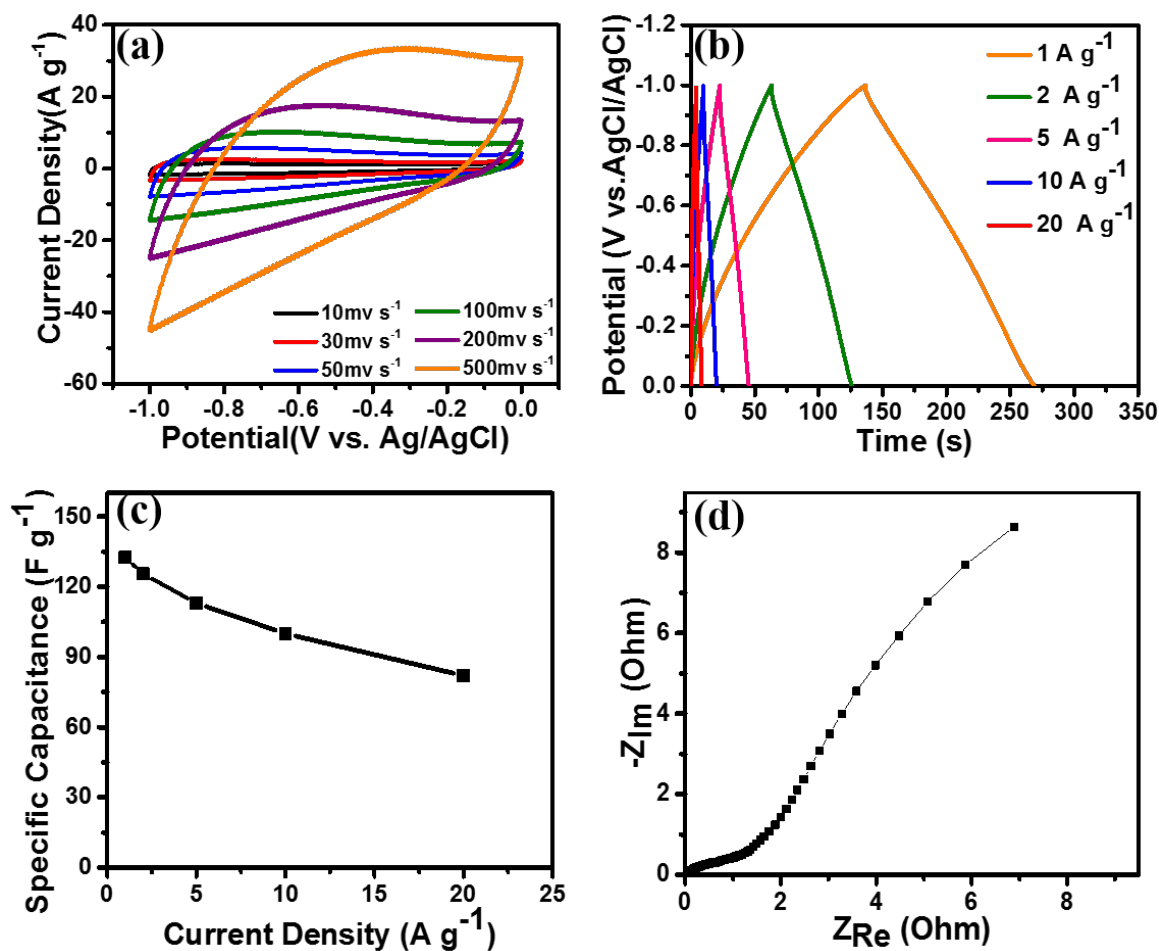

**Figure S6.** The electrochemical performances of AC electrode: (a) CV curves at different scanning rates. (b) GCD curves at different current densities. (c) Specific capacitance as a function of current density, and (d) Nyquist plots.

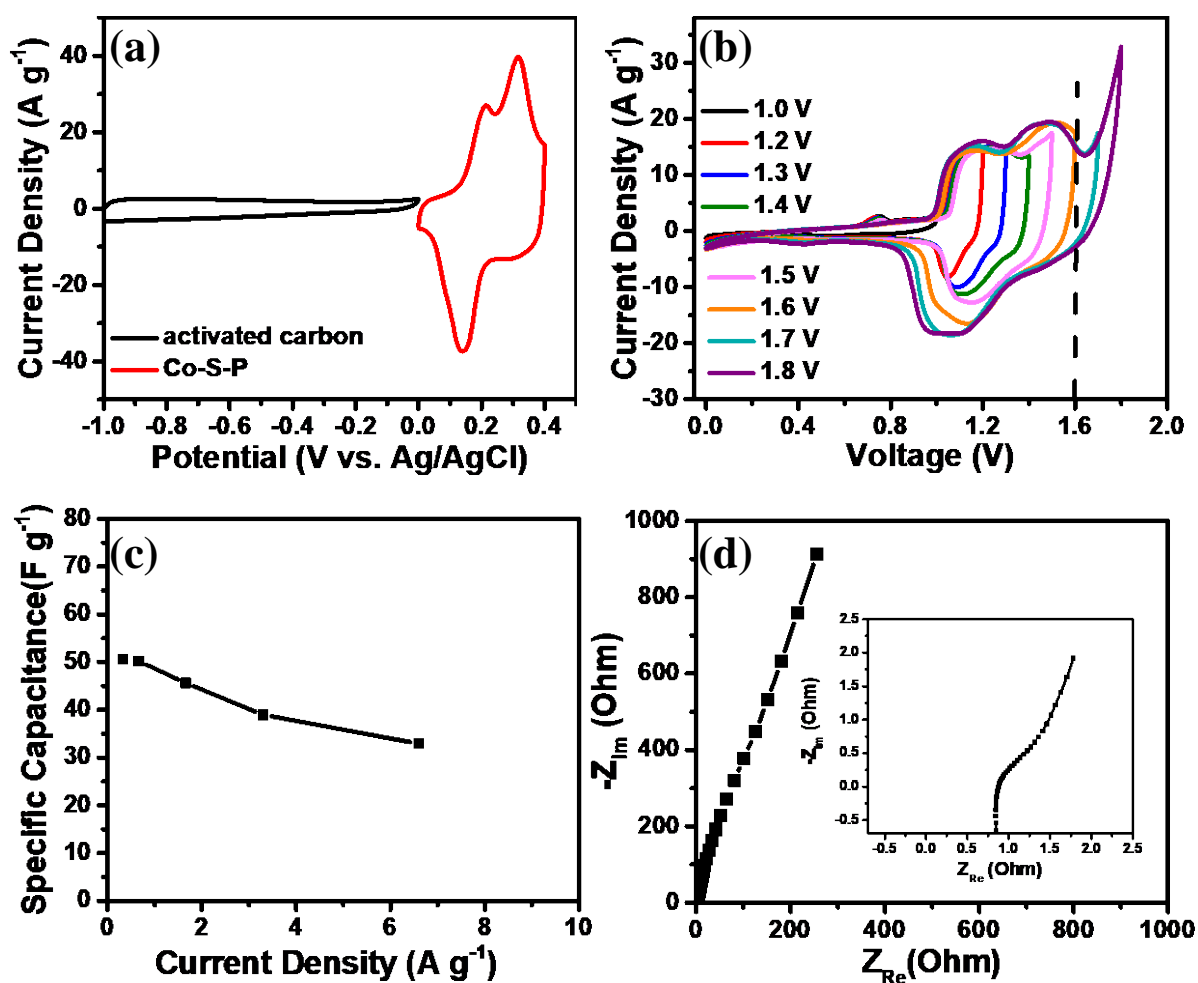

**Figure S7.** The electrochemical performance of the asymmetric device: Co-S-P//AC. (a) CV profiles of the two electrodes at the same scan rate of  $50 \text{ mV s}^{-1}$ . (b) CV curves of the device with different voltage windows at the scan rate of  $50 \text{ mV s}^{-1}$ . (c) Specific capacitance of asymmetric device at different current density. (d) Nyquist plots of asymmetric device.
